# Supplementary material
Source: PubMed Central journal article supplement (PMC3457461)
Supplement: JCM.00643-12_zjm999091970so1.pdf [file JCM.00643-12_zjm999091970so1.pdf]

Supplementary Data

Supplementary Table 1

| Candidate Loci for <i>T. vaginalis</i> MLST Scheme |                                                          |                           |                     |
|----------------------------------------------------|----------------------------------------------------------|---------------------------|---------------------|
| Gene ID                                            | Locus Name                                               | Gene Sequence Length (bp) | Accession Nos.      |
| <b>TVAG_299450</b>                                 | <b>Alanyl-tRNA Synthetase</b>                            | <b>3075</b>               | <b>XM_001315470</b> |
| TVAG_433470                                        | Aldehyde oxidase                                         | 3997                      | XM_001307868        |
| <b>TVAG_005070</b>                                 | <b>DNA mismatch Repair Protein<sup>a</sup></b>           | <b>1758</b>               | <b>XM_001301638</b> |
| TVAG_423490                                        | Eukaryotic Translation Initiation Factor 2 Gamma Subunit | 1403                      | XM_001328484        |
| <b>TVAG_258340</b>                                 | <b>Family T2, Asparaginase-like Threonine Peptidase</b>  | <b>990</b>                | <b>XM_001323020</b> |
| TVAG_206250                                        | Gamma Tubulin Complex Protein                            | 1920                      | XM_001325645        |
| <b>TVAG_134820</b>                                 | <b>Glutaminase</b>                                       | <b>886</b>                | <b>XM_001295355</b> |
| TVAG_184360                                        | Glycerate Kinase                                         | 1188                      | XM_001322722        |
| <b>TVAG_343390</b>                                 | <b>Mannose 6-Phosphate Isomerase</b>                     | <b>1128</b>               | <b>XM_001325698</b> |
| TVAG_187730                                        | mRNA Capping Enzyme                                      | 1686                      | XM_001327910        |
| TVAG_102430                                        | n6- DNA Methyltransferase                                | 654                       | XM_001321682        |
| TVAG_296220                                        | NADH Dehydrogenase 24kDa Subunit                         | 652                       | XM_001312167        |
| <b>TVAG_109540</b>                                 | <b>Serine Hydroxymethyltransferase</b>                   | <b>1356</b>               | <b>XM_001322558</b> |
| TVAG_346790                                        | Succinate Semialdehyde Dehydrogenase                     | 1398                      | XM_001310606        |
| <b>TVAG_054490</b>                                 | <b>Tryptophanase<sup>b</sup></b>                         | <b>1451</b>               | <b>XM_001330582</b> |
| TVAG_341080                                        | Tubulin Specific Chaperone B                             | 657                       | XM_001328402        |

**Supplementary Table 1.**

Sixteen candidate loci screened for inclusion in MLST scheme for *Trichomonas vaginalis*. The seven loci chosen for final MLST scheme are **bolded**.

<sup>a</sup> Single-copy gene used for population genetics analysis of *T. vaginalis* by Conrad, et al. (10, 11).

<sup>b</sup> Determined to have likely resulted from lateral gene transfer (9).

Supplementary Figure 1

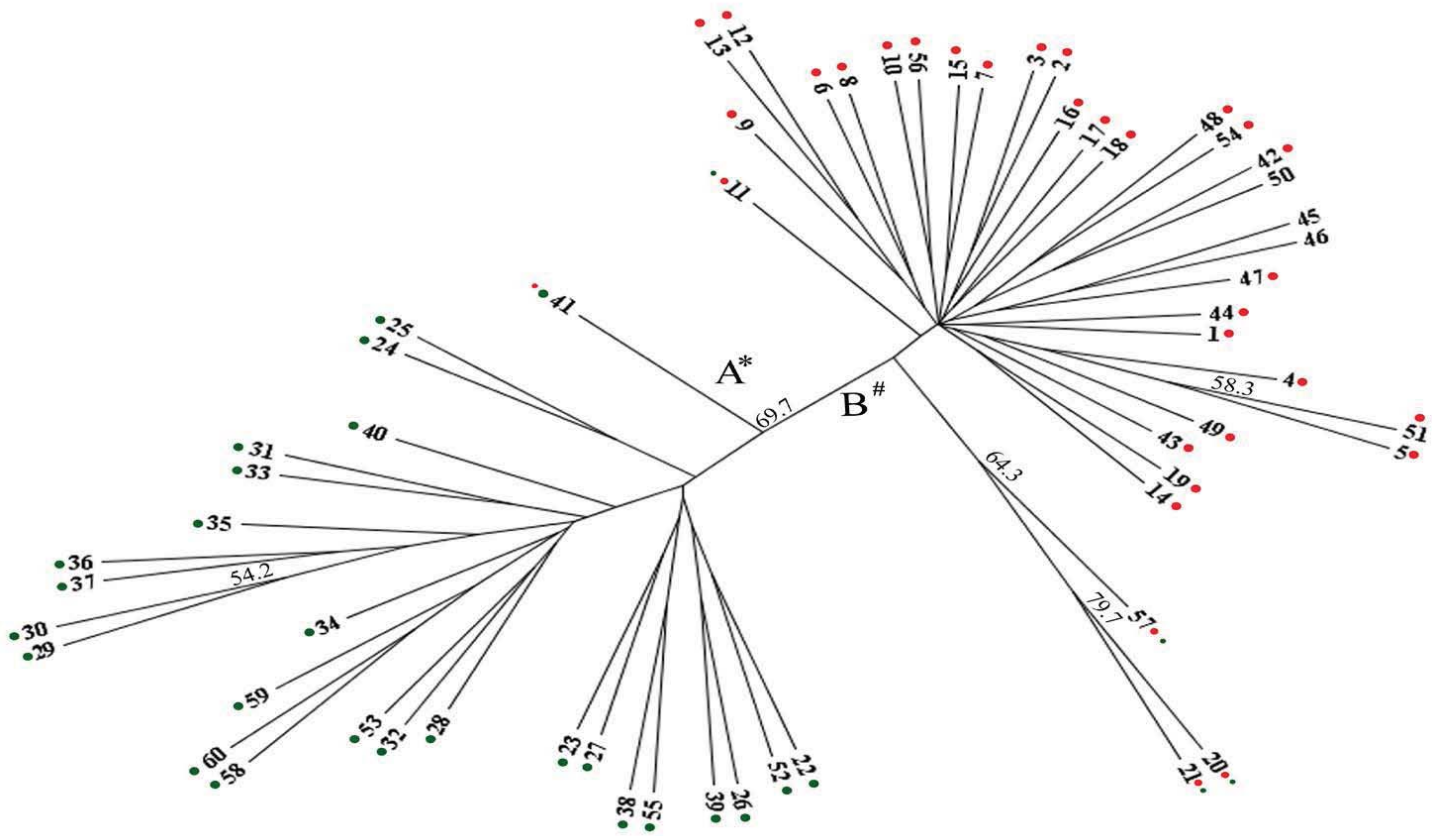

**Supplementary Figure 1. Unrooted phylogram**

Clustering analysis based on the neighbor-joining method. *Trichomonas vaginalis* sequence types (STs) clustered into two phylogenetic clades (A and B). Numbers on branches indicate bootstrap proportions based on 1000 replicates. Green and red dots correspond to the coloring scheme of Figure 1. STs with two dots indicate STs with < 85% ancestry in either population based on the Bayesian population assignments of Figure 3A.

Supplementary Figure 2

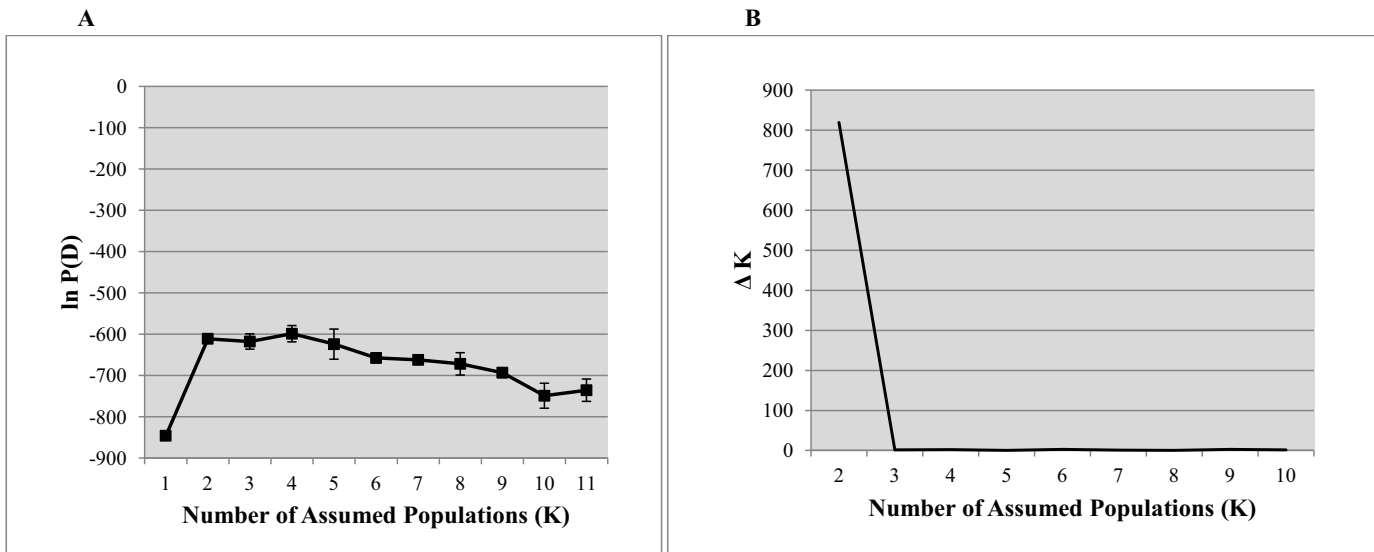

Supplementary Figure 2. Detecting the number of populations in *T. vaginalis* with STRUCTURE analysis.

A. Log probability of data [ln P(D)] for K populations using the admixture model. Average and standard deviation over 5 replicates are shown.

B. Rate of change in the log probability of the data between consecutive K values [ΔK].
